# Supplementary material for: Multiple Linear Regression Predictive Modeling of Colloidal and Fluorescence Stability of Theranostic Perfluorocarbon Nanoemulsions
Source: MDPI journal article supplement (doi:10.3390/pharmaceutics15041103), 2023-03-29
Supplement: s1 [file s1]

# **SUPPLEMENTAL INFORMATION**

## **Multiple Linear Regression Predictive Modeling of Colloidal and Fluorescence Stability of Theranostic Perfluorocarbon Nanoemulsions**

**Michele Herneisey<sup>1</sup> and Jelena M. Janjic<sup>1, 2, \*</sup>**

<sup>1</sup> Duquesne University, Graduate School of Pharmaceutical Sciences, School of Pharmacy,  
Pittsburgh, PA 15282

\* Correspondence: [janjicj@duq.edu](mailto:janjicj@duq.edu);

**Supplemental Table S1:** Summary of CQA values for each run in the design of experiments. Values that fail to meet the CQA specifications are italicized and underlined.

|            | Baseline Values                 |                       | % Diameter Change After:    |                                           |                                          | PDI After:                   |                                           |                                          | % Fluorescence Signal Loss After:       |                                        |                                         |
|------------|---------------------------------|-----------------------|-----------------------------|-------------------------------------------|------------------------------------------|------------------------------|-------------------------------------------|------------------------------------------|-----------------------------------------|----------------------------------------|-----------------------------------------|
| <i>Run</i> | <i>Diameter</i><br>(140-180 nm) | <i>PDI</i><br>(<0.25) | <i>Filtration</i><br>(<±5%) | <i>Cell Culture Conditions</i><br>(0-10%) | <i>95 Days Storage at 4°C</i><br>(<±10%) | <i>Filtration</i><br>(<0.25) | <i>Cell Culture Conditions</i><br>(<0.30) | <i>95 Days Storage at 4°C</i><br>(<0.25) | <i>24h Incubation at 25°C</i><br>(<10%) | <i>2h Incubation at 37°C</i><br>(<10%) | <i>95 Days Storage at 4°C</i><br>(<10%) |
| 1          | 166.1                           | <u>0.330</u>          | -0.06                       | 5.07                                      | <u>-10.36</u>                            | <u>0.282</u>                 | 0.284                                     | <u>0.272</u>                             | <u>21.37</u>                            | 2.67                                   | <u>52.14</u>                            |
| 2          | 158.8                           | <u>0.340</u>          | -3.00                       | 5.48                                      | <u>-15.05</u>                            | 0.221                        | 0.291                                     | 0.219                                    | <u>22.93</u>                            | 4.93                                   | <u>50.42</u>                            |
| 3          | 167.8                           | 0.155                 | <u>16.92</u>                | <u>-0.12</u>                              | <u>-11.47</u>                            | <u>0.340</u>                 | 0.144                                     | 0.126                                    | 3.82                                    | -2.53                                  | -2.21                                   |
| 4          | 149.2                           | 0.153                 | 2.44                        | 1.26                                      | 9.79                                     | 0.201                        | 0.163                                     | 0.136                                    | 8.72                                    | 1.57                                   | <u>14.68</u>                            |
| 5          | 164.7                           | 0.191                 | 0.61                        | 6.09                                      | <u>-10.55</u>                            | 0.222                        | 0.254                                     | 0.219                                    | <u>23.44</u>                            | <u>13.98</u>                           | <u>45.82</u>                            |
| 6          | 156.0                           | 0.215                 | -0.41                       | 6.70                                      | -7.58                                    | 0.203                        | 0.243                                     | 0.217                                    | <u>31.19</u>                            | <u>13.09</u>                           | <u>60.82</u>                            |
| 7          | 165.6                           | 0.145                 | 1.41                        | 4.64                                      | -0.44                                    | 0.138                        | 0.136                                     | 0.145                                    | 9.54                                    | 3.65                                   | <u>39.50</u>                            |
| 8          | 154.8                           | 0.144                 | -0.95                       | 5.46                                      | 9.22                                     | 0.125                        | 0.170                                     | 0.171                                    | <u>18.63</u>                            | 4.18                                   | <u>33.63</u>                            |
| 9          | 163.7                           | 0.187                 | 2.06                        | 6.02                                      | -7.44                                    | 0.177                        | 0.226                                     | 0.187                                    | <u>28.07</u>                            | <u>20.68</u>                           | <u>53.39</u>                            |
| 10         | 160.6                           | 0.195                 | 0.69                        | 5.41                                      | -4.22                                    | 0.195                        | 0.226                                     | 0.196                                    | <u>26.98</u>                            | <u>14.78</u>                           | <u>50.27</u>                            |
| 11         | 171.5                           | 0.127                 | 1.36                        | 4.48                                      | -1.54                                    | 0.134                        | 0.152                                     | 0.117                                    | 9.76                                    | 4.83                                   | <u>27.40</u>                            |
| 12         | 167.9                           | 0.147                 | -1.55                       | 7.90                                      | 6.17                                     | 0.147                        | 0.151                                     | 0.164                                    | <u>20.56</u>                            | <u>10.03</u>                           | <u>34.56</u>                            |

**Supplemental Table S2:** Summary of QC values for each run in the design of experiments.

| <i>Run</i> | % Diameter Change After:                 |                                        | PDI After:                               |                                        | % Fluorescence Signal Loss After:     |                                       |                                        |
|------------|------------------------------------------|----------------------------------------|------------------------------------------|----------------------------------------|---------------------------------------|---------------------------------------|----------------------------------------|
|            | <i>7 Days<br/>Incubation at<br/>80°C</i> | <i>215 Days<br/>Storage at<br/>4°C</i> | <i>7 Days<br/>Incubation at<br/>80°C</i> | <i>215 Days<br/>Storage at<br/>4°C</i> | <i>72h<br/>Incubation at<br/>25°C</i> | <i>12h<br/>Incubation<br/>at 37°C</i> | <i>215 Days<br/>Storage at<br/>4°C</i> |
| 1          | -7.59                                    | -14.31                                 | 0.316                                    | 0.261                                  | 48.18                                 | 47.41                                 | 72.69                                  |
| 2          | -14.09                                   | -15.89                                 | 0.229                                    | 0.222                                  | 50.63                                 | 51.74                                 | 76.76                                  |
| 3          | 0.93                                     | -12.45                                 | 0.137                                    | 0.124                                  | 11.75                                 | 13.17                                 | 8.17                                   |
| 4          | 32.84                                    | 15.57                                  | 0.174                                    | 0.153                                  | 28.25                                 | 20.76                                 | 37.72                                  |
| 5          | -10.53                                   | -14.49                                 | 0.226                                    | 0.211                                  | 59.37                                 | 59.03                                 | 62.06                                  |
| 6          | -13.58                                   | -9.79                                  | 0.152                                    | 0.196                                  | 62.86                                 | 62.61                                 | 81.13                                  |
| 7          | 3.40                                     | -1.64                                  | 0.137                                    | 0.139                                  | 28.39                                 | 23.04                                 | 66.19                                  |
| 8          | 15.02                                    | 12.30                                  | 0.210                                    | 0.173                                  | 36.98                                 | 31.82                                 | 47.37                                  |
| 9          | -9.23                                    | -11.34                                 | 0.194                                    | 0.190                                  | 55.48                                 | 68.08                                 | 58.62                                  |
| 10         | -7.25                                    | -7.39                                  | 0.189                                    | 0.178                                  | 59.51                                 | 65.81                                 | 64.08                                  |
| 11         | 3.11                                     | -2.55                                  | 0.145                                    | 0.119                                  | 27.28                                 | 27.61                                 | 34.35                                  |
| 12         | 10.06                                    | 8.54                                   | 0.201                                    | 0.184                                  | 35.90                                 | 38.66                                 | 47.50                                  |

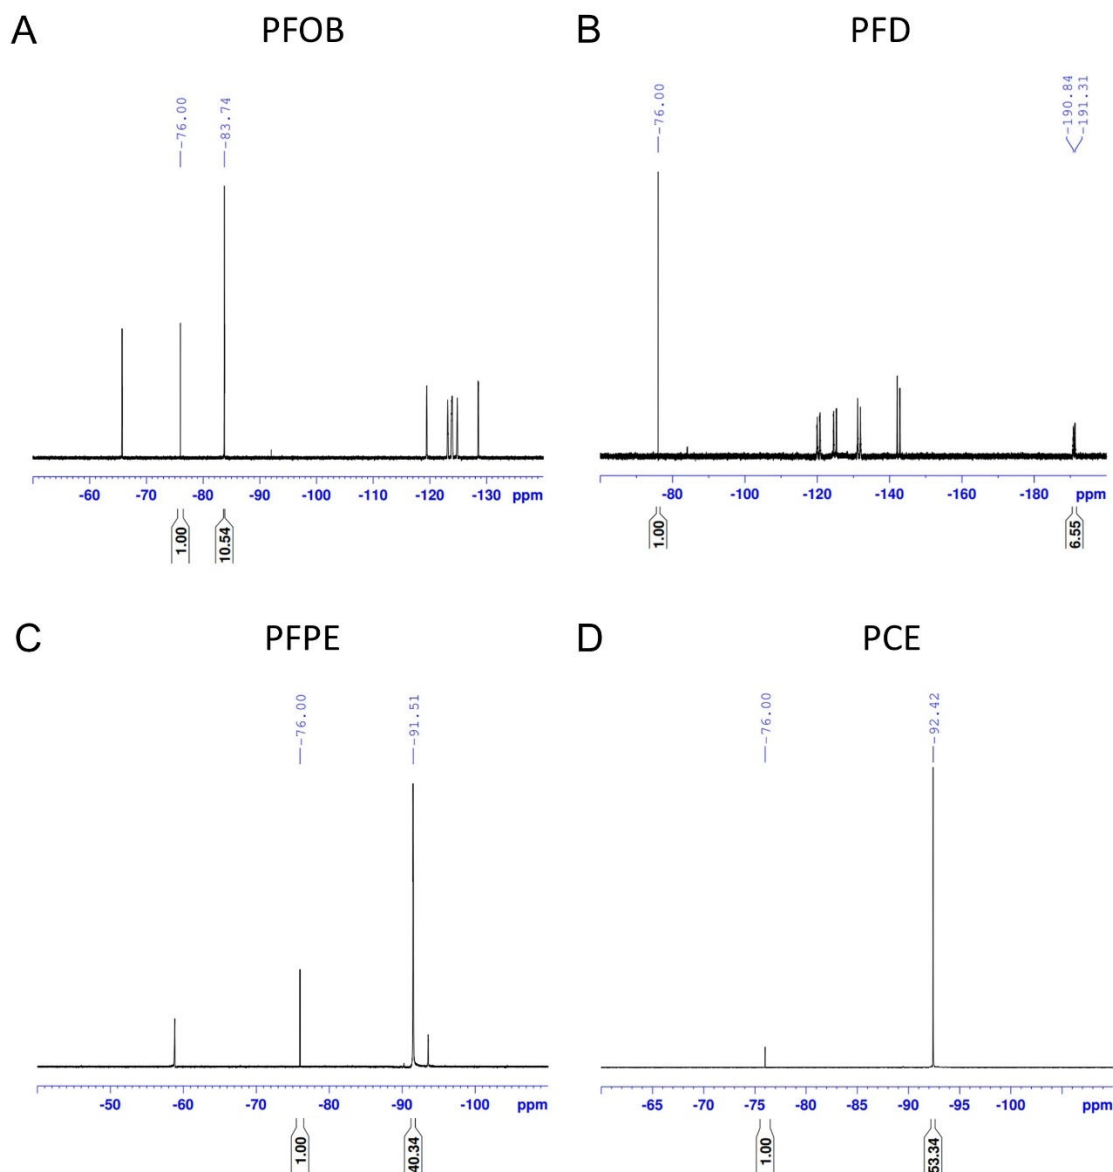

**Supplemental Figure S1:** Example NMR spectra obtained from nanoemulsion samples. Spectra of resuspended nanoemulsion containing 6% w/v olive oil are shown for (A) perfluorooctyl bromide (PFOB); (B) perfluorodecalin (PFD); (C) perfluoro(polyethylene glycol dimethyl ether) oxide (PFPE). (D) perfluoro-15-crown-5-ether (PCE). Peak positions (blue, top) and integration areas (bottom, black) are shown for the peaks used to quantify perfluorocarbon content.

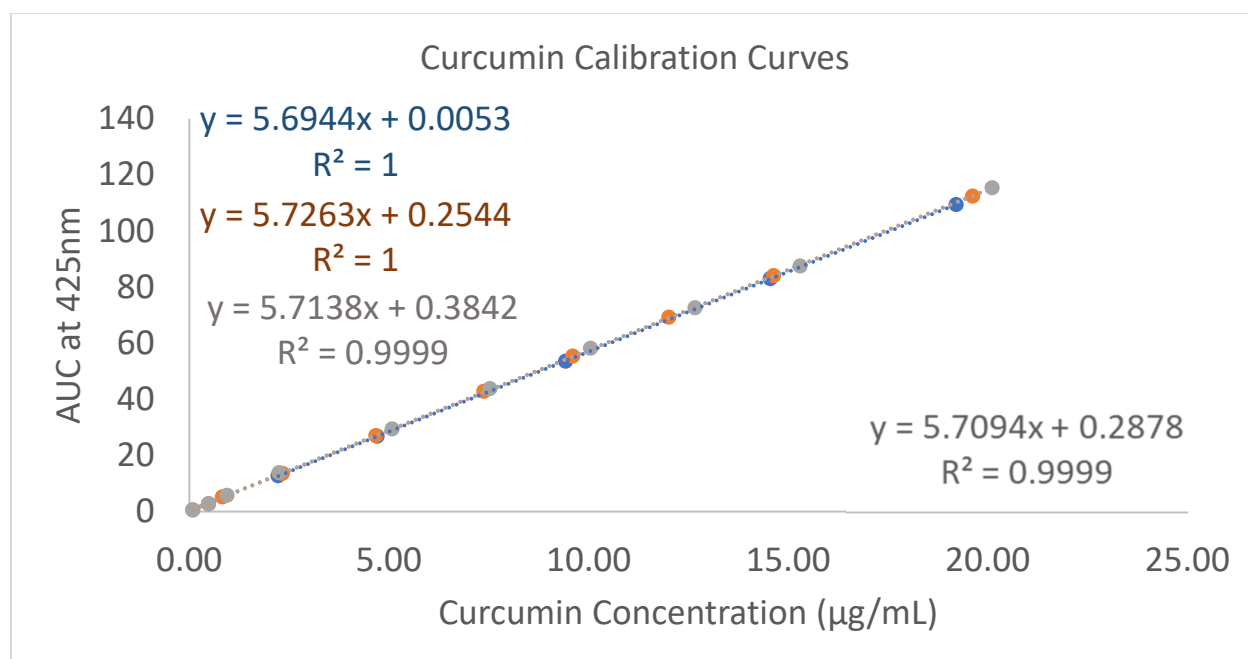

**Supplemental Figure S2:** Curcumin HPLC calibration curves. The calibration curve was performed in triplicate using three separately prepared stock solutions. These three curves were combined to generate a single line of best fit (bottom right equation), which was used to quantify curcumin in nanoemulsion samples.
